# Supplementary material for: Assessing the potential for up‐cycling recovered resources from anaerobic digestion through microbial protein production
Source: PubMed Central journal article supplement (PMC8085915; doi:10.1111/1751-7915.13600), 2020-06-11
Supplement: MBT2-14-897-s001.pdf [file MBT2-14-897-s001.pdf]

## **Supplementary information**

### **Assessing the potential for up-cycling recovered resources from anaerobic digestion through microbial protein production**

Kristof Verbeeck<sup>1,2</sup>, Jo De Vrieze<sup>1</sup>, Ilje Pikaar<sup>3</sup>, Willy Verstraete<sup>4</sup>, Korneel Rabaey<sup>1,5</sup>✉

<sup>1</sup>Center for Microbial Ecology & Technology (CMET), Ghent University, Coupure Links 653, B-9000 Gent, Belgium

<sup>2</sup> Current affiliation: ArcelorMittal Belgium, John F. Kennedylaan 51, 9042 Gent, Belgium

<sup>3</sup> Advanced Water Management Centre (AWMC), The University of Queensland, QLD 4072, Australia

<sup>4</sup> Avecom NV, Industrierweg 122P, B-9032, Wondelgem, Belgium

<sup>5</sup> CAPTURE, [www.capture-resources.be](http://www.capture-resources.be)

✉ Corresponding author: Korneel Rabaey; Ghent University; Faculty of Bioscience Engineering; Center for Microbial Ecology and Technology (CMET); Coupure Links 653; B-9000 Gent, Belgium; phone: +32 (0)9 264 59 76; fax: +32 (0)9 264 62 48; E-mail: Korneel.Rabaey@UGent.be.

## List of Tables

Table S1. Main technical design data and general assumptions.

| Feedstock mix                                                                                | Biogas yield <sup>a</sup><br>(Nm <sup>-3</sup> biogas kg <sup>-1</sup> FM) | N content <sup>b</sup><br>(g TKN-N kg <sup>-1</sup> FM) | w.% of feedstock<br>(on FM basis) |
|----------------------------------------------------------------------------------------------|----------------------------------------------------------------------------|---------------------------------------------------------|-----------------------------------|
| <i>Maize silage</i>                                                                          | 210                                                                        | 2.07                                                    | 10 %                              |
| <i>Crops residues</i>                                                                        | 100                                                                        | 0.83                                                    | 10 %                              |
| <i>Food waste</i>                                                                            | 190                                                                        | 4.06                                                    | 10 %                              |
| <i>Pig manure</i>                                                                            | 28                                                                         | 6.30                                                    | 70 %                              |
| <u><i>Weighted average of the mix</i></u>                                                    | <u>69.4</u>                                                                | <u>5.11</u>                                             |                                   |
| Biogas production rate (Nm <sup>3</sup> h <sup>-1</sup> / ton day <sup>-1</sup> )            | 500 / 14.75                                                                |                                                         |                                   |
| Biomass input (ton FM day <sup>-1</sup> )                                                    | 172                                                                        |                                                         |                                   |
| Total solids input (ton TS day <sup>-1</sup> ) <sup>c</sup>                                  | 25.4                                                                       |                                                         |                                   |
| <b>Nitrogen mass balance</b>                                                                 |                                                                            | <u>Recovery efficiency</u>                              |                                   |
| <i>TKN-N loading rate to AD (kg N day<sup>-1</sup>)</i>                                      | 880                                                                        |                                                         |                                   |
| <i>NH<sub>4</sub><sup>+</sup>-N release rate in AD (kg N day<sup>-1</sup>)</i>               | 660                                                                        | 75 % <sup>d</sup>                                       |                                   |
| <i>NH<sub>4</sub><sup>+</sup>-N recovery in liquid digestate<br/>(kg N day<sup>-1</sup>)</i> | 528                                                                        | 80 % <sup>a</sup>                                       |                                   |
| <i>NH<sub>4</sub><sup>+</sup>-N recovery through stripping<br/>(kg N day<sup>-1</sup>)</i>   | 475                                                                        | 90 % <sup>e</sup>                                       |                                   |
| Energy density methane (kWh Nm <sup>-3</sup> ), LHV                                          | 10.85                                                                      |                                                         |                                   |
| CH <sub>4</sub> content raw biogas (vol.%)                                                   | 60 %                                                                       |                                                         |                                   |
| Energy density biogas (kWh Nm <sup>-3</sup> )                                                | 6.50                                                                       |                                                         |                                   |
| Mass density biogas (kg Nm <sup>-3</sup> )                                                   | 1.22                                                                       |                                                         |                                   |
| Energy density biogas (MWh ton <sup>-1</sup> <sub>biogas</sub> )                             | 5.33                                                                       |                                                         |                                   |

\*FM = fresh material

<sup>a</sup> (Weiland, 2010)

<sup>b</sup> (Drosg et al., 2015; Pintucci et al., 2017)

<sup>c</sup> TS content of substrates: manure(8.7 %), corn & crop residues (33 %) and food waste (20.8%) (Pintucci et al., 2017):

<sup>d</sup> (De Vrieze et al., 2019)

<sup>e</sup> (Menkveld & Broeders, 2018)

**Table S2. Estimation of the production cost of input materials for MP production at digester scale.**

| <b>1. Biogas production cost</b>                           | <i>Minimum</i> | <i>Average</i>   | <i>Maximum</i> |
|------------------------------------------------------------|----------------|------------------|----------------|
| Capital investment (€) <sup>a</sup>                        | 1 500 00       | <b>2 000 000</b> | 2 500 00       |
| CAPEX (€ ton <sup>-1</sup> biogas) <sup>b</sup>            | 18             | <b>25</b>        | 31             |
| OPEX (€ year <sup>-1</sup> ) <sup>c</sup>                  | 75 000         | <b>150 000</b>   | 250 000        |
| OPEX (€ ton <sup>-1</sup> biogas)                          | 14             | <b>28</b>        | 46             |
| Feedstock cost (€ ton <sup>-1</sup> FM) <sup>d</sup>       | 2              | <b>5.28</b>      | 10             |
| Feedstock cost (€ ton <sup>-1</sup> biogas)                | 23             | <b>62</b>        | 117            |
| Production cost (€ ton <sup>-1</sup> biogas)               | 56             | <b>115</b>       | 194            |
| Production cost (€ ton <sup>-1</sup> methane) <sup>e</sup> | 156            | <b>326</b>       | 550            |

<sup>a</sup> Assumed investment: 3000 (Min), 4000 (Avg) and 5000 (Lechtenböhmer et al.) € Nm<sup>-3</sup> h<sup>-1</sup> installed biogas capacity. Investment without investment subsidy or support.

<sup>b</sup> Depreciation period of 20 years, 3 % interest rate.

<sup>c</sup> Assuming 5 % (Min), 7.5% (Avg) and 10 % (Lechtenböhmer et al.) of the total investment per year.

<sup>d</sup> Maize silage was assumed to have a feedstock cost of 32.8 € ton<sup>-1</sup> FM and food waste a cost of 20 € ton<sup>-1</sup> FM (including transportation). Agricultural residues and manure were assumed to come in for free.

<sup>e</sup> Assumed methane content is 60 vol.%.

| <b>2. Ammonia recovery cost</b>                               | <i>Minimum</i> | <i>Average</i> | <i>Maximum</i> |
|---------------------------------------------------------------|----------------|----------------|----------------|
| CAPEX (€ ton <sup>-1</sup> N recovered)                       | 230            | <b>345</b>     | 460            |
| OPEX (€ ton <sup>-1</sup> N recovered) <sup>a</sup>           | 770            | <b>1 155</b>   | 1 540          |
| <b>Total N recovery cost (€ ton<sup>-1</sup> N recovered)</b> | <b>1 000</b>   | <b>1 500</b>   | <b>2 000</b>   |

<sup>a</sup> Based on an influent stream containing a NH<sub>3</sub>-N concentration of > 4 g L<sup>-1</sup>.

| <b>3. Hydrogen production cost</b>                          | <i>Minimum</i>     | <i>Average</i>           | <i>Maximum</i>     |
|-------------------------------------------------------------|--------------------|--------------------------|--------------------|
| Total production cost (€ ton <sup>-1</sup> H <sub>2</sub> ) | 1 800 <sup>b</sup> | <b>2 600<sup>a</sup></b> | 4 400 <sup>c</sup> |

<sup>a</sup> Future predicted levelized cost for hydrogen production using PEM electrolysis at an electricity price of 44 € per MWh. (Ayers et al., 2010)

<sup>b</sup> (Gökçek, 2010)

<sup>c</sup> Current cost for hydrogen production using PEM electrolysis at an electricity price of 44 € per MWh. (Ayers et al., 2010)

| <b>4. Oxygen production cost<sup>a</sup></b> | <i>Minimum</i> | <i>Average</i> | <i>Maximum</i> |
|----------------------------------------------|----------------|----------------|----------------|
|                                              | 26             | <b>30</b>      | 34             |

<sup>a</sup> Only for MOB case, as for the HOB case oxygen is produced via electrolysis, and costs are allocated to hydrogen.

| <b>5. Microbial protein production</b>         | <i>Minimum</i> | <i>Average</i> | <i>Maximum</i> |
|------------------------------------------------|----------------|----------------|----------------|
| Capital investment (€ m <sup>-3</sup> reactor) | 3 000          | <b>5 000</b>   | 8 000          |
| OPEX (€ ton <sup>-1</sup> MP)                  | 100            | <b>200</b>     | 300            |

| <b>6. Dewatering and drying</b>          | <i>Minimum</i> | <i>Average</i> | <i>Maximum</i> |
|------------------------------------------|----------------|----------------|----------------|
| Centrifugation (€ ton MP <sup>-1</sup> ) | -              | <b>70</b>      | -              |
| Spray drying (€ ton MP <sup>-1</sup> )   | -              | <b>90</b>      | -              |

<sup>b</sup> (Pikaar et al., 2018b)

**Table S3. Comparison between methane-oxidizing bacteria and hydrogen-oxidizing bacteria used in MP production.**

|                                                                      | <i>Methane-oxidizing bacteria</i> | <i>Hydrogen-oxidizing bacteria</i> |
|----------------------------------------------------------------------|-----------------------------------|------------------------------------|
| Cell yield (g CDW g <sup>-1</sup> COD)                               | 0.19 <sup>a</sup>                 | 0.28 <sup>b</sup>                  |
| Protein content (% Protein on CDW)                                   | 60 % <sup>c</sup>                 | 75 % <sup>d</sup>                  |
| Volumetric production rate (kg CDW m <sup>-3</sup> h <sup>-1</sup> ) | 4 <sup>e</sup>                    | 2.28 <sup>f</sup>                  |
| N content (% N on CDW)                                               | 12 %                              | 12%                                |

<sup>a</sup> (Higgins et al., 1981)<sup>b</sup> (Ishizaki & Tanaka, 1990)<sup>c</sup> (Yazdian et al., 2005)<sup>d</sup> (Volova & Barashkov, 2010)<sup>e</sup> (Ritala et al., 2017)<sup>f</sup> (Tanaka et al., 1995)**Table S4. Input feed to produce 1 ton MP via HOB vs. MOB.**

| Case | Feed (ton)      |                 |                 |                |                | Product (ton)     |
|------|-----------------|-----------------|-----------------|----------------|----------------|-------------------|
|      | CH <sub>4</sub> | CO <sub>2</sub> | NH <sub>3</sub> | H <sub>2</sub> | O <sub>2</sub> | Microbial protein |
| MOB  | 2.20            | -               | 0.20            | -              | 2.50           | 1                 |
| HOB  | -               | 3.31            | 0.16            | 0.79           | 2.05           | 1                 |

## References

- Ayers, K.E., Anderson, E.B., Capuano, C., Carter, B., Dalton, L., Hanlon, G., Manco, J., Niedzwiecki, M. (2010) Research advances towards low cost, high efficiency PEM electrolysis. *ECS Transactions*, **33**(1), 3-15.
- De Vrieze, J., Colica, G., Pintucci, C., Sarli, J., Pedizzi, C., Willeghems, G., Bral, A., Varga, S., Prat, D., Peng, L., Spiller, M., Buysse, J., Colsen, J., Benito, O., Carballa, M., Vlaeminck, S.E. (2019) Resource recovery from pig manure via an integrated approach: A technical and economic assessment for full-scale applications. *Bioresource Technology*, **272**, 582-593.
- Drosg, B., Fuchs, W., Al Seadi, T., Madsen, M., Linke, B. (2015) Nutrient recovery by biogas digestate processing. *IEA Bioenergy*, **2015**, 711.
- Gökçek, M. (2010) Hydrogen generation from small-scale wind-powered electrolysis system in different power matching modes. *International Journal of Hydrogen Energy*, **35**(19), 10050-10059.
- Higgins, I.J., Best, D.J., Hammond, R.C., Scott, D. (1981) Methane-oxidating microorganisms. *Microbiological Reviews*, **45**(4), 556-590.
- Ishizaki, A., Tanaka, K. (1990) Batch culture of *Alcaligenes eutrophus* ATCC 17697T using recycled gas closed circuit culture system. *Journal of Fermentation and Bioengineering*, **69**(3), 170-174.
- Lechtenböhmer, S., Nilsson, L.J., Åhman, M., Schneider, C. (2016) Decarbonising the energy intensive basic materials industry through electrification – Implications for future EU electricity demand. *Energy*, **115**, 1623-1631.

- Menkveld, H.W.H., Broeders, E. (2018) Recovery of ammonia from digestate as fertilizer. *Water Practice and Technology*, **13**(2), 382-387.
- Pintucci, C., Carballa, M., Varga, S., Sarli, J., Peng, L., Bousek, J., Pedizzi, C., Rusalleda, M., Tarragó, E., Prat, D. 2017. The ManureEcoMine pilot installation: advanced integration of technologies for the management of organics and nutrients in livestock waste. *Water Science and Technology*, **75**(6), 1281-1293.
- Pikaar, I., Matassa, S., Bodirsky, B.L., Weindl, I., Humpenöder, F., Rabaey, K., Boon, N., Bruschi, M., Yuan, Z., van Zanten, H., Herrero, M., Verstraete, W., Popp, A. (2018). Decoupling Livestock from Land Use through Industrial Feed Production Pathways. *Environmental Science & Technology*, **52**(13), 7351-7359.
- Ritala, A., Häkkinen, S.T., Toivari, M., Wiebe, M.G. (2017) Single cell protein—state-of-the-art, industrial landscape and patents 2001–2016. *Frontiers in microbiology*, **8**, 2009.
- Tanaka, K., Ishizaki, A., Kanamaru, T., Kawano, T. 1995. Production of poly (d-3-hydroxybutyrate) from CO<sub>2</sub>, H<sub>2</sub>, and O<sub>2</sub> by high cell density autotrophic cultivation of *Alcaligenes eutrophus*. *Biotechnology and bioengineering*, **45**(3), 268-275.
- Volova, T.G., Barashkov, V.A. (2010) Characteristics of proteins synthesized by hydrogen-oxidizing microorganisms. *Applied Biochemistry and Microbiology*, **46**(6), 574-579.
- Weiland, P. (2010) Biogas production: current state and perspectives. *Applied microbiology and biotechnology*, **85**(4), 849-860.
- Yazdian, F., Hajizadeh, S., Shojaosadati, S.A., Khalilzadeh, R., Jahanshahi, M., Nosrati, M. (2005) Production of single cell protein from natural gas: Parameter optimization and RNA evaluation. *Iran. J. Biotechnol.*, **3**(4), 235-242.
